# Supplementary material
Source: publisher site journal article supplement (https://www.dovepress.com/article/610534)
Supplement: Supplementary file 1 [file 610534%20Revised%20Supplementary%20Figure%201.docx]

**
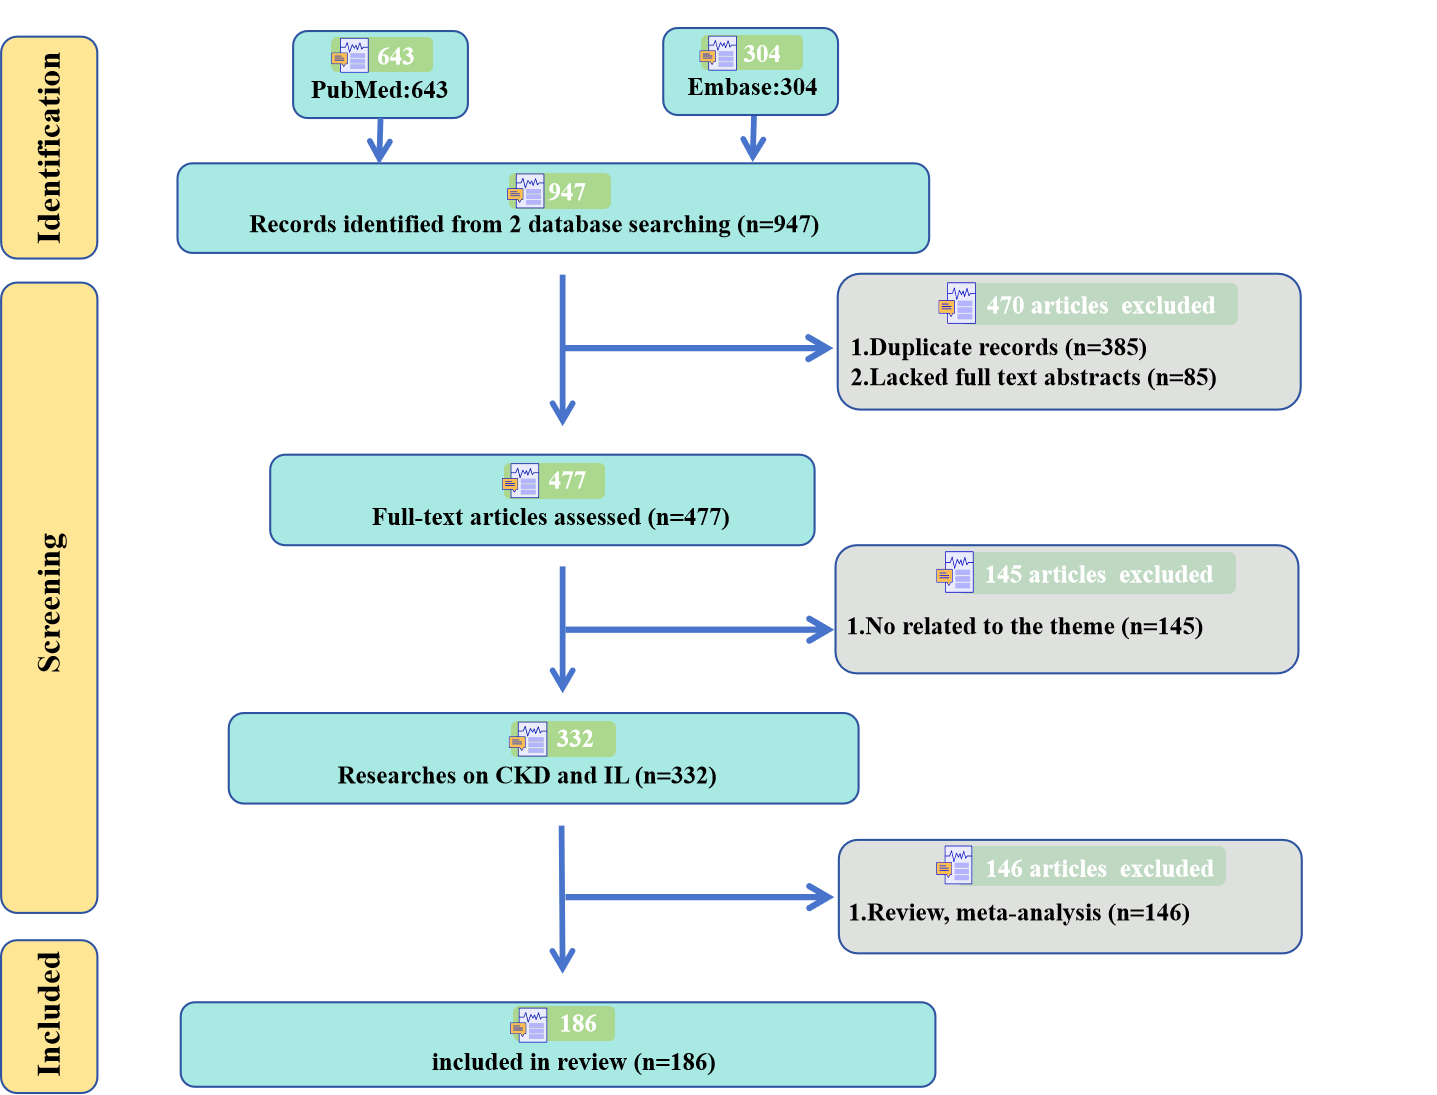
**

**Supplementary Figure 1. Flow chart of the search strategy and process.** We retrieved 947 references from the Endonte and EMBase databases, of which 385 were duplicates, 85 did not have full-text abstracts, 145 were unrelated to chronic kidney disease (CKD) and interleukin (IL), 146 were review articles or meta-analyses. Finally, a total of 186 full-text original research papers related to the research topic were included in the analysis.
